# Supplementary figures and images for: Altering Dynamics of Autonomic Processing Therapy (ADAPT) Trial: A Novel, Targeted Treatment for Reducing Anxiety in Joint Hypermobility
Source: Research Square preprint supplement (doi:10.21203/rs.3.rs-443890/v1), 2021-05-11

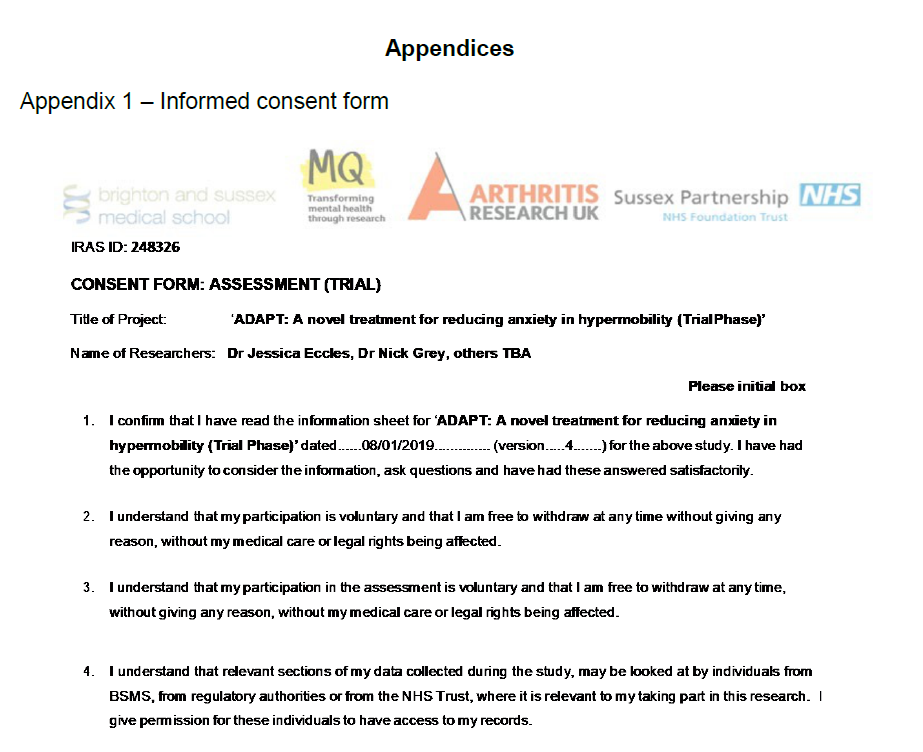


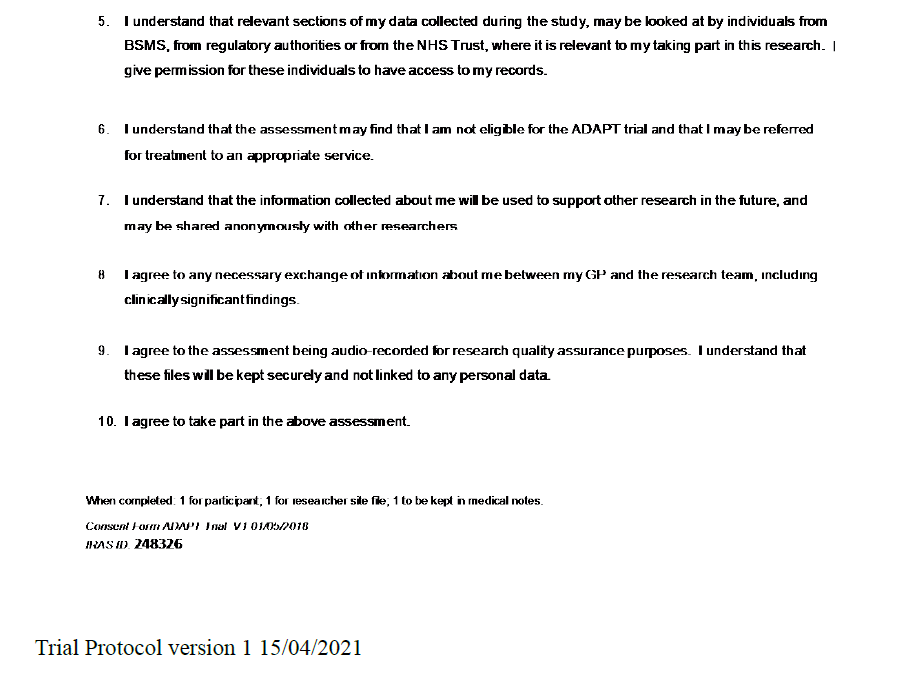


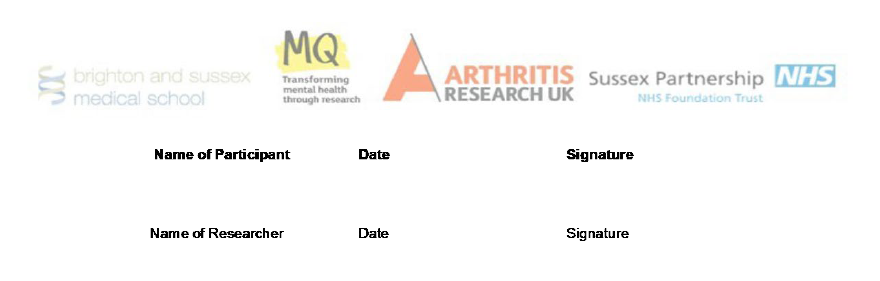

Supplement: Supplementary file 2 [file fe8376dd52610807bc315b26.docx]
